# Supplementary material
Source: Springer Nature journal article supplement (https://www.springermedizin.de/resource/supplementary/13023_2013_640_MOESM2_ESM.pdf/9642572)

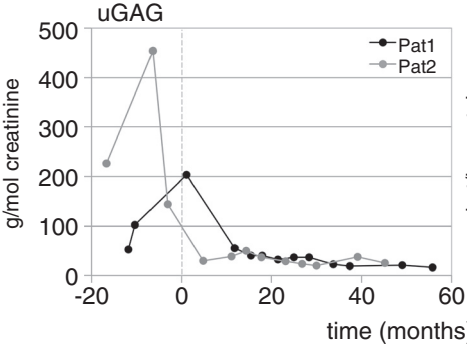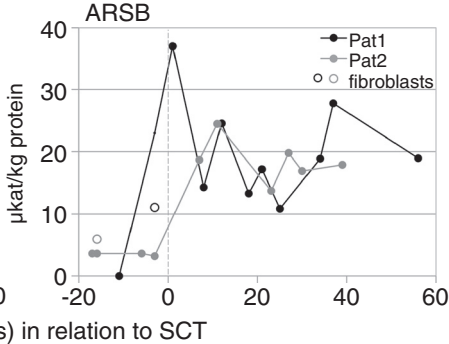

Supplement: MOESM2 [file 9642572]
